# Supplementary material for: Nature as a treasure trove of potential anti-SARS-CoV drug leads: a structural/mechanistic rationale
Source: PubMed Central journal article supplement — RSC Adv. 2020 May 27;10(34):19790–802. doi: 10.1039/d0ra04199h (PMC9122629; doi:10.1039/d0ra04199h), 2020-05-27
Supplement: RA-010-D0RA04199H-s001.pdf [file RA-010-D0RA04199H-s001.pdf]

## **Supplemental material**

### **Nature as a treasure trove of potential anti-SARS-CoV drug leads: A structural/mechanistic rationale**

Ahmed M. Sayed<sup>1</sup>, Amira R. Khattab<sup>2</sup>, Asmaa M. AboulMagd<sup>3</sup>, Hossam M. Hassan<sup>4,5</sup>, Mostafa E. Rateb<sup>6</sup>, Hala Zaid<sup>7</sup>, Usama Ramadan Abdelmohsen<sup>8,9\*</sup>

<sup>1</sup>*Department of Pharmacognosy, Faculty of Pharmacy, Nahda University, 62513 Beni-Suef, Egypt;*

<sup>2</sup>*Pharmacognosy Department, College of Pharmacy, Arab Academy for Science, Technology and Maritime Transport, 1029 Alexandria, Egypt;*

<sup>3</sup>*Pharmaceutical Chemistry Department, Faculty of Pharmacy, Nahda University, 62513 Beni Suef, Egypt;*

<sup>4</sup>*Department of Pharmacognosy, Faculty of Pharmacy, Beni-Suef University, 62514 Beni-Suef, Egypt;*

<sup>5</sup>*Department of Pharmacognosy, Faculty of Pharmacy, Nahda University, 62513 Beni-Suef, Egypt;*

<sup>6</sup>*School of Computing, Engineering & Physical Sciences, University of the West of Scotland, Paisley PA1 2BE, UK;*

<sup>7</sup>*Ministry of Health and Population, Cairo, Egypt;*

<sup>8</sup>*Department of Pharmacognosy, Faculty of Pharmacy, Minia University, 61519 Minia, Egypt;*

<sup>9</sup>*Department of Pharmacognosy, Faculty of Pharmacy, Deraya University, Universities Zone, P.O. Box 61111 New Minia City, Minia, Egypt.*

**\*Correspondence:** Usama Ramadan Abdelmohsen: Tel +2-86-2347759; email [usama.ramadan@mu.edu.eg](mailto:usama.ramadan@mu.edu.eg)

**Table S1. List of previously reported anti-CoV natural products**

| Compound                 | Class     | subclass | Target | Smile                                                                                                                                                                                                                                                                                                                | IC50 (μM) | MW     | Num. rotatable bonds | Num. H-bond acceptors | Num. H-bond donors | TPSA   | Log P | Water Solubility | GI absorption | Lipinski                                    | Veber                                 | Bioavailability | Lead likeness | Synthetic accessibility |
|--------------------------|-----------|----------|--------|----------------------------------------------------------------------------------------------------------------------------------------------------------------------------------------------------------------------------------------------------------------------------------------------------------------------|-----------|--------|----------------------|-----------------------|--------------------|--------|-------|------------------|---------------|---------------------------------------------|---------------------------------------|-----------------|---------------|-------------------------|
| Tannic acid              | Phenolics | Tannin   | Mpro   | <chem>C1=C(C=C(C(=C1O)O)OC(=O)OC2=CC(=CC(=C2O)O)C(=O)OC[C@@H]3[C@@H]([C@@H]([C@@H]([C@@H]([C@@H](O3)OC(=O)C4=CC(=C(C(=C4)OC(=O)C5=CC(=C(C(=C5)O)O)O)O)OC(=O)C6=CC(=C(C(=C6)OC(=O)C7=CC(=C(C(=C7)O)O)O)O)OC(=O)C8=CC(=C(C(=C8)OC(=O)C9=CC(=C(C(=C9)O)O)O)O)OC(=O)C1=CC(=C(C(=C1)OC(=O)C1=CC(=C(C(=C1)O)O)O)O)O</chem> | 3         | 1701.2 | 31                   | 46                    | 25                 | 777.98 | 4.29  | Yes              | Low           | No; 3 violations: MW>500, NorO>10, NHorOH>5 | No; 2 violations: Rotors>10, TPSA>140 | 0.17            | NO            | 10                      |
| Theaflavin 3,3-digallate | Phenolics | Tannin   | Mpro   | <chem>C1[C@H]([C@H](OC2=CC(=CC(=C21)O)O)C3=CC4=C(C(=C(C=C4[C@H]5[C@H](CC6=C(C=C6O5)</chem>                                                                                                                                                                                                                           | 9.5       | 868.7  | 8                    | 20                    | 13                 | 351.12 | 2.23  | Yes              | Low           | No; 3 violations: MW>500, NorO>10,          | No; 1 violation: TPSA>140             | 0.17            | NO            | 6.36                    |

|                                |           |           |        |                                                                                                                        |       |        |    |    |    |        |      |     |     |                                               |                            |      |    |      |
|--------------------------------|-----------|-----------|--------|------------------------------------------------------------------------------------------------------------------------|-------|--------|----|----|----|--------|------|-----|-----|-----------------------------------------------|----------------------------|------|----|------|
|                                |           |           |        | O)O)OC(=O)C7=CC(=C(C(=C7)O)O)O)O)C(=O)C(=C3)O)OC(=O)C8=CC(=C(C(=C8)O)O)O                                               |       |        |    |    |    |        |      |     |     | NHorOH >5                                     |                            |      |    |      |
| Dieckol                        | Phenolics | Tannin    | Mpro   | C1=C(C=C(C=C1O)OC2=C(C=C(C3=C2OC4=C(C=C(C=C4O3)OC5=C(C=C(C=C5O)OC6=C(C=C(C7=C6OC8=C(C=C(C=C8O7)O)O)O)O)O)O)O           | 15    | 742.55 | 6  | 18 | 11 | 287.14 | 2.66 | Yes | Low | No; 3 violation s: MW>500, NorO>10, NHorOH >6 | No; 1 violation : TPSA>141 | 0.17 | NO | 4.68 |
| Tetra-o-galloyl-beta-d-glucose | Phenolics | Tannin    | ACE2-S | C1=C(C=C(C=C1O)O)C(=O)OCC2C(C(C(C(O2)OC(=O)C3=CC(=C(C=C3)O)O)O)OC(=O)C4=CC(=C(C(=C4)O)O)O)OC(=O)C5=CC(=C(C(=C5)O)O)O)O | 4.2   | 788.57 | 13 | 22 | 13 | 377.42 | 0.07 | Yes | Low | No; 3 violation s: MW>500, NorO>10, NHorOH >7 | No; 1 violation : TPSA>142 | 0.17 | NO | 5.92 |
| Rhoifolin                      | Phenolics | Flavonoid | Mpro   | C[C@H]1[C@@H]([C@H]([C@H]([C@H](O1)O)[C@@H]2[C@H]([C@@H]([C@H](O[C@@H]2)OC3=CC(=C4C(=C3)OC(=CC4=O)C5=C=C(C=C5)O)O      | 27.45 | 578.52 | 6  | 14 | 8  | 228.97 | 1.31 | Yes | Low | No; 3 violation s: MW>500, NorO>10, NHorOH >7 | No; 1 violation : TPSA>142 | 0.17 | NO | 6.33 |

|                          |           |           |      |                                                                                                                                 |       |        |   |    |   |        |      |     |      |                                            |                           |      |     |      |
|--------------------------|-----------|-----------|------|---------------------------------------------------------------------------------------------------------------------------------|-------|--------|---|----|---|--------|------|-----|------|--------------------------------------------|---------------------------|------|-----|------|
|                          |           |           |      | )CO)O)O)O)O)O                                                                                                                   |       |        |   |    |   |        |      |     |      |                                            |                           |      |     |      |
| Epigallocatechin gallate | Phenolics | Flavonoid | Mpro | C1[C@H]([C@H](OC2=CC(=CC(=C21)O)O)C3=CC(=C(C(=C3)O)O)OC(=O)C4=CC(=C(C(=C4)O)O)O                                                 | 73    | 458.37 | 4 | 11 | 8 | 197.37 | 1.53 | Yes | Low  | No; 3 violations: MW>50, NorO>10, NHorOH>8 | No; 1 violation: TPSA>143 | 0.17 | NO  | 4.2  |
| Gallocatechin gallate    | Phenolics | Flavonoid | Mpro | C1[C@H]([C@H](OC2=CC(=CC(=C21)O)O)C3=CC(=C(C(=C3)O)O)O)OC(=O)C4=CC(=C(C(=C4)O)O)O                                               | 47    | 458.37 | 4 | 11 | 8 | 197.37 | 1.83 | Yes | Low  | No; 3 violations: MW>50, NorO>10, NHorOH>9 | No; 1 violation: TPSA>144 | 0.17 | NO  | 4.2  |
| Pectolinarin             | Phenolics | Flavonoid | Mpro | C[C@H]1[C@H]([C@H]([C@H]([C@H](O1)OC[C@@H]2[C@H]([C@H]([C@H]([C@H](O2)OC3=C(C(=C4C(=C3)OC(=CC4=O)C5=CC=C(C=C5)OC)O)OC)O)O)O)O)O | 73.78 | 622.57 | 8 | 15 | 7 | 227.2  | 3.41 | Yes | Low  | No; 3 violations: MW>50, NorO>10, NHorOH>8 | No; 1 violation: TPSA>143 | 0.17 | NO  | 6.63 |
| Herbacetin               | Phenolics | Flavonoid | Mpro | C1=CC(=CC=C1C2=C(C(=O)C3=C(O2)C(=C(C=C3O)O)O)O                                                                                  | 33.17 | 302.24 | 1 | 7  | 5 | 131.36 | 1.5  | Yes | High | Yes                                        | Yes                       | 0.55 | Yes | 3.2  |

|              |           |           |      | O                                                                                                 |       |        |   |    |   |        |      |     |      |                                    |                           |      |     |      |
|--------------|-----------|-----------|------|---------------------------------------------------------------------------------------------------|-------|--------|---|----|---|--------|------|-----|------|------------------------------------|---------------------------|------|-----|------|
| Hesperetin   | Phenolics | Flavonoid | Mpro | <chem>COC1=C(C=C(C=C1)[C@@H]2CC(=O)C3=C(C=C(C=C3O2)O)O)O</chem>                                   | 18.1  | 302.28 | 2 | 6  | 3 | 96.22  | 2.24 | Yes | High | Yes                                | Yes                       | 0.55 | Yes | 3.02 |
| Daidzein     | Phenolics | Flavonoid | Mpro | <chem>C1=CC(=CC=C1C2=COC3=C(C2=O)C=CC(=C3)O)O</chem>                                              | 26.8  | 254.24 | 1 | 4  | 2 | 70.67  | 1.77 | Yes | High | Yes                                | Yes                       | 0.55 | Yes | 2.79 |
| Hyperoside   | Phenolics | Flavonoid | Mpro | <chem>c1cc(c(cc1c2c(c(=O)c3c(cc(cc3o2)O)O)[C@H]4[C@@H]([C@H]([C@H]([C@H](O4)CO)O)O)O)O)O)O</chem> | 42.79 | 464.38 | 4 | 12 | 8 | 210.51 | 1.45 | Yes | Low  | No; 2 violation: NorO>10, NHorOH>5 | No; 1 violation: TPSA>140 | 0.17 | NO  | 5.32 |
| Apigenin     | Phenolics | Flavonoid | Mpro | <chem>O=C1C=C(C2=CC=C(O)C=C2)OC3=CC(O)=CC(O)=C31</chem>                                           | 200   | 270.24 | 1 | 5  | 3 | 90.9   | 1.89 | Yes | High | Yes                                | Yes                       | 0.55 | Yes | 2.96 |
| Luteolin     | Phenolics | Flavonoid | Mpro | <chem>O=C1C=C(C2=CC=C(O)C(O)=C2)OC3=CC(O)=CC(O)=C31</chem>                                        | 20    | 286.24 | 1 | 6  | 4 | 111.13 | 1.86 | Yes | High | Yes                                | Yes                       | 0.55 | Yes | 3.02 |
| Quercetin    | Phenolics | Flavonoid | Mpro | <chem>O=C1C(O)=C(C2=CC=C(O)C(O)=C2)OC3=CC(O)=CC(O)=C31</chem>                                     | 83.1  | 302.24 | 1 | 7  | 5 | 131.36 | 1.63 | Yes | High | Yes                                | Yes                       | 0.55 | Yes | 3.23 |
| Scutellarein | Phenolics | Flavonoid | Mpro | <chem>C1=CC(=CC=C1C2=CC(=O)C3=C(O2)C=C(C(=C3O)O)O)O</chem>                                        | 33.1  | 286.24 | 1 | 6  | 4 | 111.13 | 2.08 | Yes | High | Yes                                | Yes                       | 0.55 | Yes | 3.04 |

|                      |           |           |       |                                                                                                    |      |        |   |    |   |        |      |          |      |                                   |                            |      |     |      |
|----------------------|-----------|-----------|-------|----------------------------------------------------------------------------------------------------|------|--------|---|----|---|--------|------|----------|------|-----------------------------------|----------------------------|------|-----|------|
| Quercetage tin       | Phenloics | Flavonoid | Mpro  | <chem>C1=CC(=C(C=C1)C2=C(C(=O)C3=C(O)C=C(C(=C3O)O)O)O)</chem>                                      | 12   | 318.24 | 1 | 8  | 6 | 151.59 | 1.73 | Yes      | Low  | Yes                               | No; 1 violation : TPSA>140 | 0.55 | Yes | 3.27 |
| Myricetin            | Phenloics | Flavonoid | Mpro  | <chem>C1=C(C=C(C(=C1O)O)O)C2=C(C(=O)C3=C(C=C(C=C3O2)O)O)O</chem>                                   | 34.6 | 318.24 | 1 | 8  | 6 | 151.59 | 1.73 | Yes      | Low  | Yes                               | No; 1 violation : TPSA>141 | 0.55 | Yes | 3.27 |
| Robinetin            | Phenloics | Flavonoid | Mpro  | <chem>C1=CC2=C(C=C1O)OC(=C(C2=O)O)C3=CC(=C(C(=C3O)O)O)O</chem>                                     | 67.2 | 302.24 | 1 | 7  | 5 | 131.36 | 1    | Yes      | High | Yes                               | Yes                        | 0.55 | Yes | 3.21 |
| Amentoflavone        | Phenloics | Flavonoid | Mpro  | <chem>O=C1C=C(C2=CC=C(O)C=C2)OC3=C(C4=C(O)C=CC(C5=C(C(C(O)=CC(O)=C6O5)=O)=C4)C(O)=CC(O)=C31</chem> | 8.3  | 538.46 | 3 | 10 | 6 | 181.8  | 3.06 | NO       | Low  | No; 2 violations: MW>50, NHorOH>5 | No; 1 violation : TPSA>140 | 0.17 | NO  | 4.27 |
| Flavonoid Derivative | Phenloics | Flavonoid | PLpro | <chem>OC(C(OC)=C1)=CC=C1[C@@H]2[C@@H](O)C(C3=C(O)C4=C(O[C@](CC(C(C)O)C(C)CC4)C=C3C2)=O</chem>      | 5    | 470.55 | 6 | 7  | 4 | 116.45 | 3.24 | Moderate | High | Yes                               | Yes                        | 0.55 | Yes | 5.01 |
| Papyriflavinol A     | Phenloics | Flavonoid | PLpro | <chem>CC(=CCC1=C(C(=CC(=C1)C2=C(C(=O)C3=C(O2)C=C(C(=C3O)CC=C(C)C)</chem>                           | 3.7  | 438.47 | 5 | 7  | 5 | 131.36 | 3.69 | Moderate | Low  | Yes                               | Yes                        | 0.55 | Yes | 4.24 |

|                   |           |           |       |                                                                                                                                               |      |        |   |    |   |        |      |          |      |                                     |                            |      |     |      |
|-------------------|-----------|-----------|-------|-----------------------------------------------------------------------------------------------------------------------------------------------|------|--------|---|----|---|--------|------|----------|------|-------------------------------------|----------------------------|------|-----|------|
|                   |           |           |       | O)O)O)C                                                                                                                                       |      |        |   |    |   |        |      |          |      |                                     |                            |      |     |      |
| Kaempferol        | Phenolics | Flavonoid | PLpro | <chem>C1=CC(=CC=C1C2=C(C(=O)C3=C(C=C(C=C3O2)O)O)O)O</chem>                                                                                    | 16.3 | 286.24 | 1 | 6  | 4 | 111.13 | 1.7  | Yes      | High | Yes                                 | Yes                        | 0.55 | Yes | 3.14 |
| Bavachinin        | Phenolics | Flavonoid | PLpro | <chem>CC(=CCC1=CC2=C(C=C1OC)O[C@@H](CC2=O)C3=CC=C(C=C3)O)C</chem>                                                                             | 38.4 | 338.4  | 4 | 4  | 1 | 55.76  | 3.47 | Moderate | High | Yes                                 | Yes                        | 0.55 | Yes | 3.7  |
| Neobavaisoflavone | Phenolics | Flavonoid | PLpro | <chem>CC(=CCC1=C(C=CC(=C1)C2=COC3=C(C2=O)C=CC(=C3)O)O)C</chem>                                                                                | 18.3 | 322.35 | 3 | 4  | 2 | 70.67  | 3.03 | Moderate | High | Yes                                 | Yes                        | 0.55 | Yes | 3.35 |
| Corylifol A       | Phenolics | Flavonoid | PLpro | <chem>CC(=CCC/C(=C/CC1=C(C=CC(=C1)C2=COC3=C(C2=O)C=C(C(=C3)O)O)/C)C</chem>                                                                    | 32.3 | 390.47 | 6 | 4  | 2 | 70.67  | 3.83 | NO       | High | Yes                                 | Yes                        | 0.55 | Yes | 3.86 |
| Juglanin          | Phenolics | Flavonoid | Cath  | <chem>C1=CC(=CC=C1C2=C(C(=O)C3=C(C=C(C=C3O2)O)O)O[C@@H]4[C@@H]([C@@H]([C@@H](O4)CO)O)O)O</chem>                                               | 2.5  | 418.35 | 4 | 10 | 6 | 170.05 | 1.76 | Yes      | Low  | Yes                                 | No; 1 violation : TPSA>140 | 0.55 | Yes | 5    |
| Baicalin          | Phenolics | Flavonoid | Misc  | <chem>C1=CC=C(C=C1)C2=CC(=O)C3=C(C(=C(C=C3O2)O[C@@H]4[C@@H]([C@@H]([C@@H]([C@@H]([C@@H]([C@@H]([C@@H]([C@@H](O4)C(=O)O)O)O)O)O)O)O)O)O</chem> | 25   | 446.36 | 4 | 11 | 6 | 187.12 | 1.75 | Yes      | Low  | No; 3 violation s: MW>500, NorO>10, | No; 1 violation : TPSA>140 | 0.17 | NO  | 5.09 |

|                   |           |           |         |                                                                                                                             |      |        |   |    |    |        |      |          |      |                                             |                           |      |     |      |
|-------------------|-----------|-----------|---------|-----------------------------------------------------------------------------------------------------------------------------|------|--------|---|----|----|--------|------|----------|------|---------------------------------------------|---------------------------|------|-----|------|
|                   |           |           |         | O)O)O)O)O                                                                                                                   |      |        |   |    |    |        |      |          |      | NHorOH<br>>5                                |                           |      |     |      |
| Procyanidin A2    | Phenolics | Flavonoid | Misc    | <chem>C1[C@H]([C@H](OC2=C1C(=CC3=C2[C@@H]4[C@H]([C@](O3)(OC5=CC(=CC(=C45)O)O)C6=CC(=C(C=C6)O)O)O)C7=CC(=C(C=C7)O)O)O</chem> | 3.4  | 576.5  | 2 | 12 | 9  | 209.76 | 1.73 | Moderate | Low  | No; 3 violations: MW>500, NorO>10, NHorOH>5 | No; 1 violation: TPSA>140 | 0.17 | NO  | 5.85 |
| Procyanidin B1    | Phenolics | Flavonoid | Misc    | <chem>C1[C@@H]([C@H](OC2=C1C(=CC(=C2[C@@H]3[C@H]([C@H](OC4=CC(=CC(=C34)O)O)C5=CC(=C(C=C5)O)O)O)O)C6=CC(=C(C=C6)O)O)O</chem> | 41.3 | 578.52 | 3 | 12 | 10 | 220.76 | 1.27 | Yes      | Low  | No; 3 violations: MW>500, NorO>10, NHorOH>5 | No; 1 violation: TPSA>140 | 0.17 | NO  | 5.32 |
| Myricetin         | Phenolics | Flavonoid | Hilcase | <chem>C1=C(C=C(C(=C1O)O)O)C2=C(C(=O)C3=C(C=C(C=C3O2)O)O)O</chem>                                                            | 44.3 | 318.24 | 1 | 8  | 6  | 151.59 | 1.08 | Yes      | Low  | Yes                                         | No; 1 violation: TPSA>140 | 0.55 | NO  | 3.27 |
| Scutellarein      | Phenolics | Flavonoid | Hilcase | <chem>C1=CC(=CC=C1C2=CC(=O)C3=C(O2)C=C(C(=C3O)O)O)O</chem>                                                                  | 34.6 | 286.24 | 1 | 6  | 4  | 111.13 | 2.08 | Yea      | High | Yes                                         | Yes                       | 0.55 | Yes | 3.04 |
| Isoliquiritigenin | Phenolics | Chalcones | PLpro   | <chem>C1=CC(=CC=C1/C=C/C(=O)C2=C(C=C(C=C2)O)O)O</chem>                                                                      | 24.6 | 256.25 | 3 | 4  | 3  | 77.76  | 2.02 | Yes      | High | Yes                                         | Yes                       | 0.55 | Yes | 2.52 |



|                         |           |           |       |                                                                                   |      |        |   |   |   |       |      |          |      |     |     |      |     |      |
|-------------------------|-----------|-----------|-------|-----------------------------------------------------------------------------------|------|--------|---|---|---|-------|------|----------|------|-----|-----|------|-----|------|
| Isobavachalcone         | Phenolics | Chalcones | PLpro | <chem>CC(=CCC1=C(C=CC(=C1O)C(=O)/C=C/C2=C=C(C=C2)O)O)C</chem>                     | 7.3  | 324.37 | 5 | 4 | 3 | 77.76 | 3.02 | Moderate | High | Yes | Yes | 0.55 | Yes | 3.03 |
| 4'-O-methylbavachalcone | Phenolics | Chalcones | PLpro | <chem>CC(=CCC1=CC(=C(C=C1OC)O)C(=O)/C=C/C2=CC=C(C=C2)OC)C</chem>                  | 10.1 | 352.42 | 7 | 4 | 1 | 55.76 | 4.07 | Moderate | High | Yes | Yes | 0.55 | Yes | 3.21 |
| Chalcone 1              | Phenolics | Chalcones | Mpro  | <chem>OC(C=C1)=CC=C1/C=C/C(C2=C(O)C(C/C=C(C)/C)=C(O)C=C2)=O</chem>                | 11.9 | 324.37 | 5 | 4 | 3 | 77.76 | 3.02 | Moderate | Low  | Yes | Yes | 0.55 | Yes | 3.03 |
| Chalcone 2              | Phenolics | Chalcones | Mpro  | <chem>OC(C=C1)=CC=C1/C=C/C(C2=C(O)C(C/C=C(C)/CC/C=C(C)/C)=C(O)C=C2)=O</chem>      | 5.8  | 392.49 | 8 | 4 | 3 | 77.76 | 4.06 | NO       | High | Yes | Yes | 0.55 | Yes | 3.57 |
| Chalcone 3              | Phenolics | Chalcones | Mpro  | <chem>OC(C=C1)=CC=C1/C=C/C(C2=C(O)C(C[C@H](O)C(C)=C)C(OC)C=C2)=O</chem>           | 9.3  | 354.4  | 7 | 5 | 3 | 86.99 | 2.87 | Moderate | High | Yes | Yes | 0.55 | Yes | 3.64 |
| Chalcone 4              | Phenolics | Chalcones | Mpro  | <chem>OC(C=C1)=CC=C1/C=C/C(C2=C(O)C(C/C=C(C)/CC[C@H](O)C(C)=C)C(OC)C=C2)=O</chem> | 8.6  | 354.4  | 7 | 5 | 3 | 86.99 | 2.87 | Moderate | High | Yes | Yes | 0.55 | Yes | 4.03 |
| Chalcone 5              | Phenolics | Chalcones | Mpro  | <chem>OC(C=C1)=C(O)C=C1/C=C/C(C2=C(O)C(C/C</chem>                                 | 27.9 | 340.37 | 5 | 5 | 4 | 97.99 | 2.54 | Moderate | High | Yes | Yes | 0.55 | Yes | 3.13 |

|                            |           |                |       |                                                                     |      |        |   |   |   |       |              |          |      |     |     |      |     |      |
|----------------------------|-----------|----------------|-------|---------------------------------------------------------------------|------|--------|---|---|---|-------|--------------|----------|------|-----|-----|------|-----|------|
|                            |           |                |       | <chem>=C(C)/C=C(O)C=C2)=O</chem>                                    |      |        |   |   |   |       |              |          |      |     |     |      |     |      |
| Chalcone 6                 | Phenolics | Chalcones      | Mpro  | <chem>OC(C(O)=C1)=C(C/C=C(C(O)/C)=C=C1C2OC3=C(C(O)=CC=C3C)C2</chem> | 34.7 | 326.39 | 3 | 4 | 3 | 69.92 | 2.97         | Moderate | High | Yes | Yes | 0.55 | Yes | 3.71 |
| N-trans-caffeoyltyramine   | Phenolics | Cinnamic acids | PLpro | <chem>C1=CC(=CC=C1CCNC(=O)/C=C/C2=CC(=C(C=C2)O)O</chem>             | 44.4 | 299.32 | 6 | 4 | 4 | 89.79 | 2.00<br>2.00 | Yes      | High | Yes | Yes | 0.55 | Yes | 2.43 |
| N-trans-coumaroyltyramine  | Phenolics | Cinnamic acids | PLpro | <chem>C1=CC(=CC=C1CCNC(=O)/C=C/C2=CC=C(C=C2)O)O</chem>              | 38.8 | 283.32 | 6 | 3 | 3 | 69.56 | 2.05         | Yes      | High | Yes | Yes | 0.55 | Yes | 2.28 |
| N-trans-feruloyltyramine   | Phenolics | Cinnamic acids | PLpro | <chem>COC1=C(C=CC(=C1)/C=C/C(=O)NCCC2=CC=C(C=C2)O)O</chem>          | 70.1 | 313.35 | 7 | 4 | 3 | 78.79 | 2.58         | Yes      | High | Yes | Yes | 0.55 | Yes | 2.55 |
| Terrestriamide             | Phenolics | Cinnamic acids | PLpro | <chem>COC1=C(C=CC(=C1)/C=C/C(=O)NCC(=O)C2=CC=C(C=C2)O)O</chem>      | 21.5 | 327.33 | 7 | 5 | 3 | 95.86 | 2.02         | Yes      | High | Yes | Yes | 0.55 | Yes | 2.55 |
| N-trans-feruloyloctopamine | Phenolics | Cinnamic acids | PLpro | <chem>COC1=C(C=CC(=C1)/C=C/C(=O)NCC(C2=CC=C(C=C2)O)O)O</chem>       | 23.2 | 329.35 | 7 | 5 | 4 | 99.02 | 2.22         | Yes      | High | Yes | Yes | 0.55 | Yes | 3.05 |
| Psoralidin                 | Phenolics | Cinnamic acids | PLpro | <chem>CC(=CCC1=CC2=C(C=C1)OC(=O)C3=C2OC4=C3C=CC(=C4)O)C</chem>      | 4.2  | 336.34 | 2 | 5 | 2 | 83.81 | 3.15         | NO       | High | Yes | Yes | 0.55 | Yes | 3.4  |

|                     |           |               |        |                                                                                                |      |        |   |   |   |        |      |     |      |     |     |      |     |      |
|---------------------|-----------|---------------|--------|------------------------------------------------------------------------------------------------|------|--------|---|---|---|--------|------|-----|------|-----|-----|------|-----|------|
| Emodin              | Phenolics | Anthraquinone | ACE2-S | <chem>O=C2c1cc(cc(O)c1C(=O)c3c2cc(O)cc3O)C</chem>                                              | 1    | 270.24 | 0 | 5 | 3 | 94.83  | 1.81 | Yes | High | Yes | Yes | 0.55 | Yes | 2.57 |
| Rhein               | Phenolics | Anthraquinone | ACE2-S | <chem>C1=CC2=C(C(=C1)O)C(=O)C3=C(C=C(C=C3C2=O)C(=O)O)O</chem>                                  | 9.5  | 284.22 | 1 | 6 | 3 | 111.9  | 1.37 | Yes | High | Yes | Yes | 0.55 | Yes | 2.58 |
| Aloeemodin          | Phenolics | Anthraquinone | Mpro   | <chem>C1=CC2=C(C(=C1)O)C(=O)C3=C(C2=O)C=C(C=C3O)CO</chem>                                      | 35.7 | 270.24 | 1 | 5 | 3 | 94.83  | 1.95 | Yes | High | Yes | Yes | 0.55 | Yes | 2.6  |
| Heptanoid Drevative | Phenolics | Heptanoid     | Plpro  | <chem>O=C(/C=C/CCC1=CC=C(O)C(O)=C1)CCC2=CC(O)=C(O)C=C2</chem>                                  | 4.1  | 328.36 | 7 | 5 | 4 | 97.99  | 2.02 | Yes | High | Yes | Yes | 0.55 | Yes | 2.48 |
| Indigo              | Alkaloid  | Isatin        | Mpro   | <chem>C1=CC=C2C(=C1)C(=C(N2)C3=NC4=CC=CC=C4C3=O)O</chem>                                       | 37.3 | 262.26 | 1 | 3 | 2 | 65.45  | 2.19 | Yes | High | Yes | Yes | 0.55 | Yes | 2.95 |
| Indirubin           | Alkaloid  | Isatin        | Mpro   | <chem>C1=CC=C2C(=C1)C(=C(N2)O)C3=NC4=CC=CC=C4C3=O</chem>                                       | 81.3 | 262.26 | 1 | 3 | 2 | 65.45  | 2.13 | Yes | High | Yes | Yes | 0.55 | Yes | 2.84 |
| Indican             | Alkaloid  | Isatin        | Mpro   | <chem>C1=CC=C2C(=C1)C(=CN2)O[C@H]3[C@@H]([C@H]([C@@H]([C@H]([C@H]([C@H](O3)CO)O)O)O)O)O</chem> | 33.1 | 295.29 | 3 | 6 | 5 | 115.17 | 0.64 | Yes | High | Yes | Yes | 0.55 | Yes | 4.23 |
| Tryptanthrin        | Alkaloid  | Isatin        | PLpro  | <chem>C1=CC=C2C(=C1)C(=O)N3C4=CC=CC=C4C(=O)C3=N2</chem>                                        | 1.52 | 248.24 | 0 | 3 | 0 | 51.96  | 1.95 | Yes | High | Yes | Yes | 0.55 | Yes | 2.42 |

|              |          |               |       |                                                                                                                             |        |        |    |    |   |        |      |     |      |                                     |                                     |      |     |      |
|--------------|----------|---------------|-------|-----------------------------------------------------------------------------------------------------------------------------|--------|--------|----|----|---|--------|------|-----|------|-------------------------------------|-------------------------------------|------|-----|------|
| Indigodole B | Alkaloid | Isatin        | PLpro | <chem>O=C2c1c(ccc1)N3C(=O)c4c(N[C@]23CC)cccc4</chem>                                                                        | 2.6    | 278.31 | 1  | 2  | 1 | 49.41  | 2.3  | Yes | High | Yes                                 | Yes                                 | 0.55 | Yes | 3    |
| Sinigrin     | Alkaloid | thioglycoside | Mpro  | <chem>C=CC/C(=N\OS(=O)(=O)O)/S[C@H]1[C@@H]([C@H]([C@@H]([C@H](O1)CO)O)O</chem>                                              | 50.3   | 359.37 | 7  | 10 | 5 | 199.79 | 0.96 | Yes | Low  | Yes                                 | No; 1 violation : TPSA>140          | 0.11 | NO  | 5.35 |
| Lycorine     | Alkaloid | Indole        | Misc  | <chem>C1CN2CC3=CC4=C(C=C3[C@H]5[C@H]2C1=C[C@@H]([C@H]5O)OCO4</chem>                                                         | 15.7   | 287.31 | 0  | 5  | 2 | 62.16  | 2.42 | Yes | High | Yes                                 | Yes                                 | 0.17 | Yes | 4.2  |
| Reserpine    | Alkaloid | Indole        | Misc  | <chem>CO[C@H]1[C@@H](C[C@@H]2CN3CCCC4=C([C@H]3C[C@@H]2[C@@H]1C(=O)OC)NC5=C4C=CC(=C5)OC)OC(=O)C6=CC(=C(C(=C6)OC)OC)OC</chem> | 3.4    | 608.68 | 10 | 10 | 1 | 117.78 | 5.16 | NO  | High | No; 2 violations: NorO>10, NHorOH>5 | No; 2 violations: NorO>10, NHorOH>5 | 0.56 | NO  | 5.92 |
| MDL28170     | Peptide  | Small peptide | Cath  | <chem>CC(C)[C@@H](C(=O)N[C@@H](CC1=CC=C(C=C1)C=O)NC(=O)OCC2=CC=CC=C2</chem>                                                 | 0.0025 | 382.45 | 12 | 4  | 2 | 84.5   | 2.62 | NO  | Low  | Yes                                 | No; 1 violation : TPSA>141          | 0.55 | NO  | 3.67 |
| Tokaramide A | Peptide  | Small peptide | Mpro  | <chem>O=C(N[C@@H](C(C)C)C(N[C@@H](C(C)C)C(N[C@H](C([</chem>                                                                 | 5.6    | 476.57 | 17 | 6  | 7 | 186.5  | 1.58 | Yes | Low  | No; 2 violations: NorO>1            | No; 2 violations: Rotors>           | 0.17 | NO  | 4.09 |

|                 |          |               |      |                                                                                                                                                     |     |        |    |    |    |        |      |     |     |                                              |                                       |      |     |      |
|-----------------|----------|---------------|------|-----------------------------------------------------------------------------------------------------------------------------------------------------|-----|--------|----|----|----|--------|------|-----|-----|----------------------------------------------|---------------------------------------|------|-----|------|
|                 |          |               |      | H)=O)CCCNC(N)=N)=O)=O)C1=CC=C(O)C=C1                                                                                                                |     |        |    |    |    |        |      |     |     | 0, NHorOH >5                                 | 10, TPSA>140                          |      |     |      |
| Miraziridine A  | Peptide  | Small peptide | Mpro | OC(C(N1)C1C(N[C@H](CC(C)C)C(N[C@@H](CC(C)C)[C@@H](O)CC(N[C@H](CC)C(N[C@@H](CCCNC(N)=N)/C=C/C(O)=O)=O)=O)=O                                          | 6.8 | 668.78 | 27 | 11 | 11 | 295.07 | 0.8  | Yes | Low | No; 2 violations: NorO>10, NHorOH >6         | No; 2 violations: Rotors>10, TPSA>141 | 0.17 | NO  | 6.65 |
| Betulinic acid  | Terpenes | Triterpene    | Mpro | CC(=C)[C@@H]1CC[C@]2([C@H]1[C@H]3CC[C@@H]4[C@@]5(CC[C@@H](C([C@@H]5CC[C@]4([C@@]3(CC2)C)C)C)O)C)C(=O)O                                              | 8.2 | 456.7  | 2  | 3  | 2  | 57.53  | 3.81 | NO  | Low | Yes                                          | Yes                                   | 0.56 | Yes | 5.63 |
| Saikosaponin B2 | Terpenes | Triterpene    | Misc | C[C@@H]1[C@@H]([C@@H]([C@@H](O1)O[C@H]2CC[C@]3([C@H]([C@]2(C)CO)CC[C@@]4([C@@H]3C=CC5=C6CC(CC[C@@]6([C@@H](C[C@]54C)O)CO)(C)C)C)O)O[C@H]7[C@@H]([C@ | 1.7 | 780.98 | 7  | 13 | 9  | 218.99 | 3.47 | Yes | Low | No; 3 violations: MW>500, NorO>10, NHorOH >5 | No; 1 violation: TPSA>140             | 0.17 | NO  | 9.17 |

|            |          |                  |      |                                                                                                                                                                                                                                                                                               |      |         |    |    |    |        |      |          |      |                                               |                            |      |     |      |
|------------|----------|------------------|------|-----------------------------------------------------------------------------------------------------------------------------------------------------------------------------------------------------------------------------------------------------------------------------------------------|------|---------|----|----|----|--------|------|----------|------|-----------------------------------------------|----------------------------|------|-----|------|
|            |          |                  |      | H]([C@@H]([C@@H](O7)CO)O)O)O                                                                                                                                                                                                                                                                  |      |         |    |    |    |        |      |          |      |                                               |                            |      |     |      |
| Aescin     | Terpenes | Triterpene       | Misc | C/C=C(/C)C(=O)O[C@H]1[C@@H]([C@@]2([C@@H](C[C@@]3(C=CC[C@H]4[C@]3(CC[C@@H]5[C@@]4(CC[C@@H]([C@]5(C)CO)O[C@H]6[C@@H]([C@H]([C@@H]([C@@H]([C@@H](O6)C(=O)O)O[C@H]7[C@@H]([C@H]([C@@H]([C@@H]([C@@H](O7)CO)O)O)O[C@H]8[C@@H]([C@H]([C@@H]([C@@H]([C@@H](O8)CO)O)O)C)C[C@@H]2CC1(C)C)O)CO)OC(=O)C | 6    | 1131.26 | 16 | 24 | 13 | 388.04 | 3.43 | Yes      | Low  | No; 3 violation s: MW>500, NorO>10, NHorOH >5 | No; 1 violation : TPSA>140 | 0.11 | NO  | 10   |
| Savinin    | Terpenes | Phenolic terpene | Mpro | C1[C@@H](/C(=C)C2=CC3=C(C=C2)OCO3)/C(=O)O1)CC4=C C5=C(C=C4)O CO5                                                                                                                                                                                                                              | 9.1  | 352.34  | 3  | 6  | 0  | 63.22  | 2.86 | Moderate | High | Yes                                           | Yes                        | 0.55 | Yes | 3.62 |
| Pseurata A | Terpenes | Sesterterpene    | Mpro | C[C@@]12CC[C@H](C([C@H]1[C@H]([C@]34C2CC[C@H                                                                                                                                                                                                                                                  | 56.6 | 334.45  | 0  | 4  | 3  | 77.76  | 2.32 | Yes      | High | Yes                                           | Yes                        | 0.55 | Yes | 5.91 |

|                |          |               |      |                                                                                                       |      |        |   |   |   |       |       |     |      |     |     |      |     |      |
|----------------|----------|---------------|------|-------------------------------------------------------------------------------------------------------|------|--------|---|---|---|-------|-------|-----|------|-----|-----|------|-----|------|
|                |          |               |      | <chem>][C@H]3O)C(=C)C4=O)O)(C)C)O</chem>                                                              |      |        |   |   |   |       |       |     |      |     |     |      |     |      |
| Pseurata B     | Terpenes | Sesterterpene | Mpro | <chem>C[C@@]12CC[C@H](C([C@H]1C[C@H]([C@]34C2CC[C@H]([C@H]3O)C(=C)C4=O)O)(C)C)O</chem>                | 32.2 | 334.45 | 0 | 4 | 3 | 77.76 | 2.32  | Yes | High | Yes | Yes | 0.55 | Yes | 5.91 |
| Pseurata C     | Terpenes | Sesterterpene | Mpro | <chem>CC(=O)O[C@H]1CC[C@@]2([C@@H](C1(C)C)C[C@H]([C@]34[C@H]2CC(=O)[C@H]([C@H]3O)C(=C)C4=O)O)C</chem> | 29.2 | 390.47 | 2 | 6 | 2 | 100.9 | -2.21 | Yes | High | Yes | Yes | 0.55 | Yes | 6.02 |
| Leukamenin E   | Terpenes | Sesterterpene | Mpro | <chem>CC(=O)O[C@H]1CC[C@@]2([C@@H](C1(C)C)C[C@H]([C@]34[C@H]2CC(=O)[C@H]([C@H]3O)C(=C)C4=O)O)C</chem> | 45.5 | 376.49 | 2 | 5 | 2 | 83.83 | -1.52 | Yes | High | Yes | Yes | 0.55 | Yes | 6.02 |
| Glaucoalyxin B | Terpenes | Sesterterpene | Mpro | <chem>CC(=O)O[C@@H]1[C@H]2CC[C@H]3[C@@]1([C@@H](C[C@H]4[C@]3(CCC(=O)C4(C)C)C)O)C(=O)C2=C</chem>       | 58.6 | 374.47 | 2 | 5 | 1 | 80.67 | 2.09  | Yes | High | Yes | Yes | 0.55 | Yes | 5.99 |
| Liangshani     | Terpenes | Sesterterpene | Mpro | <chem>C[C@@]12C=C(C=O)C([C@H]</chem>                                                                  | 23.2 | 330.4  | 0 | 4 | 2 | 74.6  | 1.99  | Yes | High | Yes | Yes | 0.55 | Yes | 5.95 |

|                 |          |               |       |                                                                                        |      |        |   |   |   |       |      |          |      |     |     |      |     |      |
|-----------------|----------|---------------|-------|----------------------------------------------------------------------------------------|------|--------|---|---|---|-------|------|----------|------|-----|-----|------|-----|------|
| n A.            |          | pene          |       | 1C[C@H]([C@]34[C@H]2CC[C@H]([C@H]3O)C(=C)C4=O)O)(C)C                                   |      | 2      |   |   |   |       |      |          |      |     |     |      |     |      |
| Tanshinone 1    | Terpenes | Sesterterpene | Plpro | O=C(C1=C(C2=C3C(C)CO2)C=CC4=C1CCCC4(C)C)C3=O                                           | 0.8  | 296.36 | 0 | 3 | 3 | 43.37 | 2.81 | Moderate | High | Yes | Yes | 0.56 | Yes | 4.11 |
| Beta-sitosterol | Sterol   | Sterol        | Mpro  | CC[C@H](CC[C@@H](C)[C@H]1CC[C@@H]2[C@@]1(CC[C@H]3[C@H]2CC=C4[C@@]3(CC[C@@H](C4)O)C)C)C | 47.8 | 414.71 | 6 | 1 | 1 | 20.23 | 5.05 | NO       | Low  | Yes | Yes | 0.55 | Yes | 6.3  |

**Table S2. Top Hits retrieved from *in silico* virtual screening against COVID 19 M<sup>pro</sup>.**

| No. | Hit                       | Compound                                      | Binding Energy (kcal/mol) | RMSD (Å) | Binding interactions |
|-----|---------------------------|-----------------------------------------------|---------------------------|----------|----------------------|
| 1   | 3,4 Dihydroxyphenylglycol | C <sub>8</sub> H <sub>10</sub> O <sub>4</sub> | -11.5476351               | 1.60000  | Gln 189, Thr 190,    |



|    |                                                                                 |                                                              |             |             |                                                              |
|----|---------------------------------------------------------------------------------|--------------------------------------------------------------|-------------|-------------|--------------------------------------------------------------|
|    |                                                                                 |                                                              |             |             | Gln 192                                                      |
| 2  | Coniferyl aldehyde                                                              | C <sub>10</sub> H <sub>10</sub> O <sub>3</sub>               | -10.5984106 | 1.200000    | Gln 189, Thr 190,<br>Met 165                                 |
| 3  | Ellagic acid                                                                    | C <sub>14</sub> H <sub>6</sub> O <sub>8</sub>                | -14.4139233 | 0.000000000 | Gln 189, Thr 190,<br>Met 165, Glu 166                        |
| 4  | Glucop-coumaric acid                                                            | C <sub>15</sub> H <sub>18</sub> O <sub>8</sub>               | -11.9070959 | 3.5999999   | Gln 189, Thr 190,<br>Met 165, Gln 192,<br>Arg 188            |
| 5  | Isoxanthohumol                                                                  | C <sub>21</sub> H <sub>22</sub> O <sub>5</sub>               | -12.6585665 | 1.20000005  | Gln 189, Thr 190,<br>Glu 166, Cys 145                        |
| 6  | Ellagic acid glucoside                                                          | C <sub>20</sub> H <sub>16</sub> O <sub>13</sub>              | -14.7417517 | 1.79999995  | ASN 142, MET<br>165, CYS 145,<br>THR 26, GLY<br>143, GLN 189 |
| 7  | Acetylglucopetunidin                                                            | C <sub>24</sub> H <sub>25</sub> O <sub>13</sub> <sup>+</sup> | -15.2547722 | 0.000000000 | Gln 189, Asn 182,<br>Glu 166, Cys 145                        |
| 8  | Spiraeoside                                                                     | C <sub>21</sub> H <sub>20</sub> O <sub>12</sub>              | -16.2750187 | 0.747515559 | Gln 192, Glu 166,<br>His 41, Cys 44,<br>Met 49               |
| 9  | Kaempferol 3-O-(6-malonyl-glucoside)                                            | C <sub>24</sub> H <sub>22</sub> O <sub>14</sub>              | -13.8481274 | 0.600000024 | Gln 189, Thr 190,<br>Glu 166                                 |
| 10 | Narirutin                                                                       | C <sub>27</sub> H <sub>32</sub> O <sub>14</sub>              | -12.9922199 | 1.20129132  | Thr 190, His 41,<br>Ser 49                                   |
| 11 | Tulipanin                                                                       | C <sub>27</sub> H <sub>31</sub> O <sub>16</sub> <sup>+</sup> | -13.7354822 | 1.80000293  | Gln 189, His 41,<br>Met 165                                  |
| 12 | Spinacetin 3-[feruloyl-(<br>>2)-glucosyl-(1->6)-<br>[apiosyl-(1->2)]-glucoside] | C <sub>44</sub> H <sub>50</sub> O <sub>25</sub>              | -12.7176895 | 0.800000012 | Gln 192, Glu 166,<br>His 41, Cys 44,<br>Met 49               |

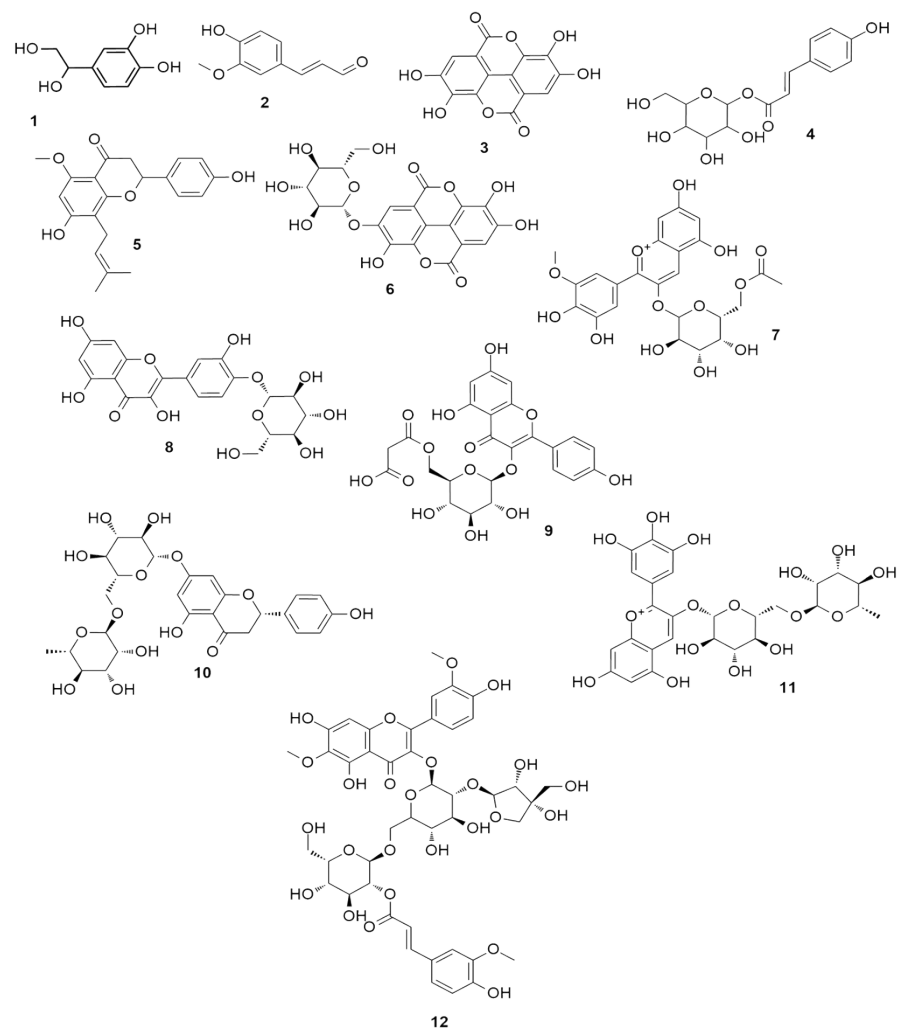

Figure S1. Structures of the top Hits retrieved from in silico virtual screening against SARS-CoV M<sup>pro</sup>.

## Methodology

### ***Drug-likeness analysis***

Drug-like properties of the reported anti-SARS-CoV natural products (Table S1) were predicted by the commercially available software LigandScout 4.3. A list of smile codes of these compounds was prepared and submitted to the software to perform the drug-likeness calculations (e.g. molecular weight, hydrogen bonds donor, hydrogen bonds acceptor, number of rotatable bonds, topological polar surface area, and logP). Subsequently, the results were exported to Microsoft Excel for the statistical analysis and figures preparation.

### ***Virtual Screening and Molecular Docking.***

All molecular docking and virtual screening studies were carried out using 'Molecular Operating Environment 2019.0101' software (MOE of Chemical Computing Group Inc. on Core i5 2.2 GHz workstation running on a Windows 10 PC. A phenolics library was selected depending on previously reported compounds for the docking-based virtual screening study. This library contains 496 compounds that can be free downloaded in 3D format in a ready-to-dock stage from (<http://phenol-explorer.eu/>). Docking of ligands onto the binding site of the COVID-19 protease enzyme was performed using the automated docking software that applies initial rescoring methodology (London dG) after docking through placement, using Triangle Matcher protocol to define the best poses of the ligand based on its binding interaction pattern with the protein. The 3D structure of the COVID-19 main protease in complex with its ligand (PDB code: 5R7Z) was available from protein data bank (PDB) at (RCSB). Three dimensional structures of the ligands, their protonation, and minimization were performed using the systemic search, for each ligand 10 different poses were analyzed and 500 top-scored ligands were investigated carefully using molecular visualization. The poses were chosen regarding their hydrophobic, and hydrogen bond interactions. On the other hand, the poses that have shown alternative binding modes in the binding site were also given special attention.
